1 **Impact of the host stage on the pear psyllid parasitoid *Trechmites insidiosus*, behaviour and**  
2 **fitness**

3 Guillaume Jean Le Goff, Jeremy Berthe, Benoit Dochy, Olivier Lebbe & Thierry Hance

4 Earth and Life Institute, Biodiversity Research Centre, Université catholique de Louvain, 4-5 Place  
5 Croix-du-Sud, B-1348 Louvain-la-Neuve, Belgium.

6

7 **Acknowledgment**

8 This research was supported by the grant 12/1/7798 of the PPP call of the Walloon Region, by an  
9 additional grant from Viridaxis S.A. and by the Interreg-Proverbio project funded by SPW-Feder-  
10 Interreg (<https://www.interreg-fwvl.eu>).

11 **Abstract**

12

13 The pear tree is a main economical orchard crops under temperate climate with more than  
14 twenty-five million tons of fruit produced each year. The psylla *Cacopsylla pyri* is the most  
15 important pest, as it infests all commercial pear tree varieties, it sucks the phloem sap and it cause  
16 damages to the trees by nutrient subtraction and disease transmission (sooty molds and  
17 phytoplasm). The management of this insect is mainly based on integrated pest management with a  
18 mix of natural and chemical controls. However, with the ban of a growing number of plant  
19 protection products and the increasing public interest in an "organic" mode of consumption, it is  
20 important to develop innovative ways of pest managements respectful of the environment.  
21 *Trechmites insidiosus* is the most abundant parasitoid of *C. pyri* but it has been poorly studied. The  
22 aim of this study is to evaluate the parasitism behaviour of *T. insidiosus* toward the different larval  
23 stages of *C. pyri*, and to evaluate the quality of the next generation individuals. We observed that  
24 stage 3 and 4 larvae are the most interesting hosts for *T. insidiosus* in order to produce individuals  
25 in quantity and in quality. This provides a basis for further studies and fulfill the lack of data  
26 concerning this insect in the literature, particularly with regard to its biology, its behaviour and its  
27 use in biological management.

28

29 **Key words:** *Trechmites insidiosus*, *Cacopsylla pyri*, Host stage, parasitoid behaviour, parasitoid  
30 fitness

31

32

33

34

35

## 36 **Introduction**

37 Fruit crops represent a major part of agricultural production with more than 865 millions tons of  
38 fruit produced each year in the world. The pear tree is one of the main cash crops under temperate  
39 climate with 1381923 hectares and a bit less than twenty-four million tons of pear produced in  
40 2018 (“FAOSTAT,” 2020)). The European pear psylla *Cacopsylla pyri* L. (Hemiptera Psyllidae)  
41 infests all commercial pear tree varieties. It presents five developmental stages in addition to the  
42 adults, and all of them (especially the larval stages) suck sap and cause direct damages to pear trees  
43 (*Pyrus communis* L.), by nutrient subtraction and therefore by weakening the trees and reducing  
44 their production. *C. pyri* also produces indirect damages caused by a high honeydew excretion on  
45 which the sooty molds can develop (Civolani, 2012). Moreover, they transmit various pathogens  
46 such as the phytoplasm *Candidatus Phytoplasma pyri* (Seemüller and Schneider, 2004) which is  
47 responsible of the pear decline disease by reducing tree vigour (Civolani, 2012). All these damages  
48 makes *C. pyri* the most important pests of European pear trees, which can cause heavy economic  
49 losses to most pear tree growing regions (Civolani, 2012).

50 Presently, *C. pyri* management is mainly based on integrated pest management with a mix of  
51 natural and chemical controls (Civolani, 2012). Indeed, an excessive use of non-selective toxic  
52 chemicals alone, decreases the effectiveness of these treatments over time because of a resistance  
53 that can appear in the treated populations (Buès et al., 2003; Civolani et al., 2007; Erler, 2004)(Buès  
54 et al., 2003; Civolani et al., 2007; Erler, 2004a). In addition, with the ban of a growing number of  
55 plant protection products and the increasing public interest in an "organic" mode of consumption, it  
56 is important to develop innovative ways of pest management respectful of the environment.  
57 Biological control and the use of beneficial insects could be then a solution for pest management in  
58 pear orchards. The bug *Anthochoris nemoralis* is known to be the main predator of the pear psylla.  
59 It is a generalist predator that may also feed on other arthropods, such as aphid mites, and  
60 lepidopteran eggs (Emami et al., 2014). However, their presence in pear orchards is generally not  
61 sufficient to control psyllid populations, especially at the beginning of the season (Erler, 2004).  
62 Indeed, the result can be variable and even in orchards without heavy chemical treatments, the  
63 predator population may not develop and the artificial introduction of this predator may represent a  
64 relatively high cost (Civolani, 2012). That is why it seems important to find other biological control

65 solutions to offer a real alternative to growers wishing to turn towards a more extensive way of  
66 production.

67 Parasitoids because of their specificity, foraging capacity, high fecundity relative to host and their  
68 potential absence of negative effect on environment can make them a promising alternative or  
69 complement to the use of *A. nemoralis*. The parasitofauna of *C. pyri* is quite diversified and several  
70 species are currently mentioned such as *Trechmites insidiosus*, *Prionomitus mitratus* (Dalman), *P.*  
71 *tiliaris* (Dalma.), *Endopsylla* sp., *Psyllaephagus procerus* Marcet, *Syrphophagus ariantes* (Walker),  
72 *Syrphophagus taeniatus* (Förster) and *Tamarixia* sp (Armand et al., 1990, 1991; Erler, 2004;  
73 Guerrieri and Noyes, 2009; Jerinic-Prodanovic et al., 2010). However, these species are difficult to  
74 rear and little information are available on their biology and on their potential use in biological  
75 control. Among these parasitoids of pear psyllids, *T. insidiosus*, even it is rarely found in pear  
76 orchards probably because of a high susceptibility to chemical treatments (Burts, 1983; Lacey et al.,  
77 2005; Sanchez, 2012) and a high level of hyperparasitism (Armand et al., 1991, 1990; McMullen,  
78 1966; Sanchez, 2012), this species is regularly cited as the most abundant (Armand et al., 1991,  
79 1990; Avilla and Artigues, 1992; Booth, 1992; Bufaur et al., 2010; Erler, 2004b; Herard, 1985;  
80 Miliczky and Horton, 2005; Sanchez, 2012). It is a koinobiont parasitoid that present several  
81 interesting characteristics in the biological management of pear psyllids such as a long period of  
82 activity as it can be present very early (April) and very late (November) in the season, meaning that  
83 it can be active at quite low temperatures (Armand et al., 1991, 1990; Bufaur et al., 2010; DuPont  
84 and John Strohm, 2020; Herard, 1985; Oudeh et al., 2013) and a first generation free of  
85 hyperparasitism (Armand et al., 1991, 1990). *T. insidiosus* is also the only species that has been  
86 used in a biocontrol program against a psyllid pest. It has been introduced in California for the  
87 biocontrol of *Cacopsylla pyricola* and while no data is available on its establishment and ability to  
88 control the psyllid for this study (Guerrieri and Noyes, 2009), several field studies revealed rates of  
89 parasitism that vary between 30 to 100% according to the location (Bufaur et al., 2010; Erler,  
90 2004b; Jaworska et al., 1998; Oudeh et al., 2013), that may lead to an effective control of the psyllid  
91 populations (Talitski, 1996 in Unruh et al., 1994).

92 The aim of this study is to evaluate for the first time in lab conditions the ability of *T. insidiosus* to  
93 control *C. pyri*. We first analysed its parasitism behaviour toward the different stages of *C. pyri* and  
94 evaluate the quality of the individuals of the following generation by measuring its developmental  
95 time, fecundity, size and sex-ratio generally used as proxy to measure the parasitoid fitness (Colinet  
96 et al., 2005). The main consensus about the stage preference of *T. insidiosus* for oviposition is that  
97 the female lays its eggs in stages 4 and 5 of pear psyllids (Armand et al., 1991, 1990; Booth, 1992) ,  
98 however, this parasitoid has also been observed to oviposit mainly in larval stages 1, 2, and 3 of

99 pear psyllids (McMullen, 1966). We therefore hypothesize, *T. insidiosus* female will be able to lay  
100 its eggs in all larval stages of *C. pyri* with a preference for the elder one that probably constitute the  
101 best hosts for the parasitoid from a nutritive point of view. We also hypothesize that the adults  
102 emerging from the elder stages will also present higher fitnesses than individuals developing in the  
103 other stages.

104

105

106

107

## 108 **Material and methods**

### 109 Biological models

110 The individual used for the experiments were initially collected from populations sampled in 2013  
111 for *Cacopsylla pyri* and in 2016 for *Trechnites insidiosus* in the experimental pear orchard of  
112 Proefcentrum voor Fruitteelt, Sint-Truiden-Belgium. The populations were maintained in the  
113 laboratory on pear trees in standardized rearing that allow us to know the stage and the age of  
114 individuals, with the following climatic conditions: 24°C, 60% RH, and L16D8.

115

### 116 Parasitoid behaviour in relation with host stage

117 To detect in which stages the parasitoid *T. insidiosus* prefers to lay eggs and the consequences on  
118 further development, a group of twenty psyllid larvae of the same stage were placed on an artificial  
119 diet and were let for settle during two hours. The differentiation of the larval stages was based on  
120 the following descriptions: the three first larval stages are creamy yellow, while the fourth and the  
121 fifth stages transit between greenish-brown to dark brown (Chang, 1977). Moreover, first larval  
122 stages are the same size of a psyllid eggs, second larval stage are twice bigger and third, fourth and  
123 fifth instars have progressively larger wing pads (Chang, 1977). A fertilized *T. insidiosus* female of  
124 less than 48 hours was then placed at the center of the set up and its behaviour was recorded for  
125 thirty minutes with a Sony handycam (HDR XR200VE) during the afternoon. The use of an  
126 artificial diet in the experiment allow to standardize the environment and to minimize its influence  
127 on the parasitoid behaviour. One replicate consisted in five set-up (one for each larval stage) and ten  
128 replicates were performed. Using the event recorder software ODRec 3.0 (© Samuel Péan), the  
129 following behaviours were recorded and quantified: the number of host feeding, the time spent for

130 grooming, the time walking, the time resting, the number of antennal contacts, the number of  
131 ovipositor insertions.

132

### 133 Parasitoid quality in relation with host stage

134 After the behavioural bioassays, all the psyllid larvae of a same replicate were placed on a same  
135 pear tree for fourteen days. We used in vitro cultivated pear trees (*Pyrus communis*) of the Williams  
136 cultivar (between 1 and 2 years old and 0.75–1 m high). Plants were obtained from Battistini Vivai  
137 ([www.battisti-rebschule.it](http://www.battisti-rebschule.it)) and stored in individual cages in a climatic room at a controlled  
138 temperature of 24°C. After fourteen days the pear trees were daily checked for mummies and adult  
139 psyllids. Each mummy was then isolated in a falcon tube with a drop of honeydew until the  
140 emergence of parasitoids. Three days after emergence, parasitoids (male and female) were stored in  
141 a freezer at -20°C until size and egg load measurements.

142 Tibia measurement was used as a proxy for individual body size. The left hind tibia of each  
143 emerging individual was measured using the ImageJ 1.440 software (Rasband, W.S., ImageJ, US  
144 National Institutes of Health, Bethesda, MD, USA, <http://rsb.info.nih.gov/ij/>, 1997–2008)

145 To estimate their egg load, each emerging female has been dissected as followed: The  
146 female was placed on an object blade with a small amount of water and crushed with a coverslip.  
147 To better extract the eggs from the abdomen, the pressure exerted on the coverslip started from the  
148 head towards the abdomen of the female. Only mature eggs (Figure 1) were counted.

149

### 150 Data analysis

151 To estimate if the parasitoid accepts to lay eggs in the stages that has been presented to the female,  
152 the host acceptance has been calculated as followed: number of ovipositor insertions divided by the  
153 number of antennal contacts. The host suitability (number of mummies divided by the number of  
154 ovipositor insertions) will then allow us to verify what host stage allows the best development of the  
155 parasitoid eggs until the adult stage. The emergence rate has also been calculated as the number of  
156 emerging adult parasitoid divided by the total number of mummies. Finally, the sex-ratio was  
157 calculated by dividing the number of males by the total number of emerging individuals.

### 158 Statistical analysis

159 Generalized linear models were performed according to the data distribution, in order to test the  
160 potential influence of the host stage on the behaviours of the laying female parasitoids: the number  
161 of host feeding (Poisson), the time spent for grooming (Gaussian), the time walking (Gaussian), the

162 time resting (Poisson), the host acceptance (number of antennal contacts/number of ovipositor  
163 insertions (Gaussian)) and on the quality of the emerging parasitoids (the number of mummies  
164 (Poisson), the host suitability (Poisson), the emergence rate (Binomial), the egg load (Poisson), and  
165 the developmental time (Gaussian)). We also used a generalized linear model (Gaussian  
166 distribution) to test the potential influence of the gender and of the host stage on the tibia size of  
167 emerging parasitoids. Moreover, Spearman correlations were made for each host stage, between the  
168 tibia size and the egg load at emergence of each female. Finally, using  $\chi^2$  tests, we compared the  
169 experimental results of sex ratio obtained for each larval stage to a 50/50 theoretical sex ratio.

170 Statistical analyses were performed using R version 3.3.3 Copyright (C) 2016 The R  
171 Foundation for Statistical Computing for Mac. All tests were applied under two-tailed hypotheses,  
172 and the significance level, P, was set at 0.05.

## 173 **Results**

174

### 175 a) Host feeding

176

177 The average number of host feeding observed in our experiments was very low, for each stage  
178 about 1 in 200 larvae were killed and then eaten by a parasitoid ( $X^2=0.19$ ,  $DF=4$ ,  $P=0.10$ ) (Table 1).

179

### 180 b) Grooming

181

182 Grooming was an important part of the behaviour expressed by the parasitoid and was in equal  
183 proportion in all tested stages (42%) ( $F=0.90$ ;  $DF=4$ ;  $P=0.47$ ) (Table 1).

184

### 185 c) Time walking

186

187 The host stage significantly influenced the walking time of the parasitoid ( $F=3.15$ ,  $DF=4$ ,  $P<0.05$ ).  
188 Indeed, in the presence of stages 3, 4 and 5, the parasitoid spent between 33 and 42% of its time  
189 walking against 28 and 18% for stages 1 and 2 respectively (st1 VS. St5:  $t=1.98$ ,  $P<0.05$ ; st2 VS  
190 St3:  $t=2.48$ ,  $P<0.05$ , st2 VS. St4:  $t=2.09$ ,  $P<0.05$ , st2 VS. St5:  $t=3.36$ ,  $P<0.01$ ) (Table 1).

191

### 192 d) Time resting

193

194 The host stage presented to the parasitoid had a significant impact on its time spent in resting  
195 ( $X^2=7.088$ ,  $DF=4$ ,  $P<0.001$ ). Parasitoids with stages 3, 4 and 5 spent less time resting (2%) than

196 those with stages 1 and 2 (17% and 32%, respectively) (st1 VS. St3:  $t=-1.99$ ,  $P<0.05$ ; st1 VS. St4:  
197  $t=-2.04$ ,  $P<0.05$ ; st1 VS. St5:  $t=-1.98$ ,  $P<0.05$ ; st2 VS. St3:  $t=-2.99$ ,  $P<0.01$ ; st2 VS. St4:  $t=-2.51$ ,  
198  $P<0.05$ ; st2 VS. St5:  $t=-2.41$ ,  $P<0.05$ ) (Table 1).

199

200 g) Antennal contact, ovipositor insertion and host acceptance

201

202 The number of antennal contacts varied significantly with the developmental stage of the host  
203 ( $\chi^2=800.30$ ,  $DF=4$ ,  $P<0.03$ ). The minimum value was observed for the stage 2 while the maximum  
204 ones were observed in the stage 3 and 4 conditions (Table 1) (st2, VS. st3:  $t=2.48$ ,  $P<0.05$ ; st2, VS.  
205 st4:  $t=2.44$ ,  $P<0.05$ )

206 The average number of ovipositor insertions was significantly different between stages  
207 ( $\chi^2=443.92$ ,  $DF=4$ ,  $P<0.01$ ) with stages 2 that received a significantly lower number of ovipositor  
208 insertions than stages 3, 4, and 5 (st2, VS. st3:  $t=2.15$ ,  $P<0.05$ ; st2, VS. st4:  $t=2.55$ ,  $P<0.05$ ; st2, VS.  
209 st4:  $t=2.30$ ,  $P<0.05$ ).

210 Moreover, acceptance was significantly different between stages ( $F=5.01$ ,  $D=4$ ,  $P<0.01$ ).  
211 Indeed, the average ratio for stages 1, 2, 3 and 4 was around 50%, while for stage 5 it was around  
212 20% (st1 VS. St5:  $t=3.70$ ,  $P<0.01$ ; st2 VS. St5:  $t=2.99$ ,  $P<0.01$ ; st3 VS. St5:  $t=3.16$ ,  $P<0.01$ ; st4 VS.  
213 St5:  $t=3.79$ ,  $P<0.001$ ) (Figure 2).

214

215 h) Number of mummies and host suitability

216

217 The average number of mummies was significantly different between stages ( $X^2=99.30$ ,  $DF=3$ ,  
218  $P<0.001$ ) with a higher mean number of mummies for the stages 3 and 4 than for stages 1 and 2 (st1  
219 vs. st3:  $Z=5.03$ ,  $P<0.001$ ; st1 vs. St4:  $Z=4.58$ ,  $P<0.001$ ; st2 vs. St3:  $Z=4.94$ ,  $P<0.001$ ; st2 vs. St4:  
220  $Z=4.47$ ,  $P<0.001$ ) (Figure 3).

221 The host suitability was significantly influenced by the host stage ( $X^2=4.45$ ,  $DF=4$ ,  
222  $P<0.001$ ). The highest ratio was observed for stages 2, 3 and 4 and was around 50% followed by  
223 stage 1 (15%) then stage 5 which had not generated any mummies (st1 vs. st2:  $t=2.67$ ,  $P<0.01$ ; st1  
224 vs. St3:  $t=3.23$ ,  $P<0.01$ ; st1 vs. St4:  $t=2.18$ ,  $P<0.05$ ) (Figure 4).

225

226 i) Emergence rate

227

228 The emergence rate did not vary significantly according to the stage ( $\chi^2=44.463$ ,  $DF=3$ ,  $P>0.05$ ). On  
229 the 162 mummies obtained, 155 emerged and 7 did not. For the stage 3, all mummies emerged

230 (72/72), while for stages 1 and 4, two mummies did not emerge (2/14 and 2/60 respectively), and  
231 for stage 2, three mummies did not emerge (3/16).

232

233 j) Sex ratio

234

235 Individuals from stages 1, 2, and 3 had a balanced sex ratio (st1:  $\chi^2=0.5$ ,  $P>0.5$ , st2:  $\chi^2=0.8$ ,  $P>0.4$ ,  
236 st3:  $\chi^2=1.48$ ,  $P>0.2$ ), while individuals from stage 4 presented a sex ratio largely in favor of females  
237 (37 females vs. 8 males) ( $\chi^2=8.52$ ,  $P<0.01$ ) (Table 2).

238

239 j) Parasitoid size

240

241 The measurement of the tibia, used here as a proxy for the size of the adult, differed significantly  
242 between the two sexes, males being smaller than females ( $F=43.35$ ,  $DF=1$ ,  $P<0.001$ ) (Table 2). The  
243 measurement of the tibia also varied according to the host stages ( $F=3.33$ ,  $DF=3$ ,  $P<0.05$ ).  
244 Individuals coming from a stage 2 larvae were in average smaller than the others (Table 2). No  
245 interaction was detected between sex and stage factors ( $F=0.96$ ,  $DF=3$ ,  $P=0.41$ ).

246

k) The egg load

247

248 No impact of the host stage had been observed on the egg load of the female with a mean of around  
249 11 mature eggs in the emerging females of all experimental condition ( $X^2=549.71$ ,  $DF=3$ ,  $P>0.2$ )  
250 (Table 2). However, a significant correlation between the tibia length and the female egg load was  
251 observed for females that developed from a stage 4 host (Spearman's  $R = 0.50$ ,  $P < 0.001$ ,  $n=46$ ), but  
252 not for females from the other stages (st1: Spearman's  $R = 0.38$ ,  $P > 0.05$ ,  $n=9$ , st2: Spearman's  $R =$   
253  $0.66$ ,  $P > 0.05$ ,  $n=9$ , st3: Spearman's  $R = 0.12$ ,  $P > 0.05$ ,  $n=35$ ) (Figure 5). The larger a female is, the  
254 more eggs she will have, but only if she has been laid in a stage 4 host.

255

l) The developmental time

The developmental time was significantly different between host stages ( $F = 34.35$ ,  $DF = 3$ ,  
 $P<0.001$ ). Individuals laid in stage 1 host take about 31 days to emerge while the others took  
between 22 and 24 days before emergence (Table 2). There was no significant difference between  
sexes ( $F=0.008$ ,  $DF=1$ ,  $P=0.78$ ), but the interaction between the stage factor and the sex factor was



significant ( $F=2, 76, DF=3, P=0.04$ ). Indeed, females that developed in stage 4 hosts seem to take more time to develop than males (Table 2).

## 256 Discussion

257 According to Armand et al. (Armand et al., 1991, 1990), and Booth, (Booth, 1992), *Trechmites*  
258 *insidiosus* lay their eggs in stages 4 and 5 of pear psyllids while for McMullen (McMullen, 1966)  
259 this parasitoid mainly oviposit in the three first larval stages.. In our study we observed that this  
260 parasitoid was able to lay eggs in the four first stages of *C. pyri*, with a higher production of  
261 mummies for eggs laid in stages 3 and 4. We also observed a lower attraction of the parasitoid  
262 toward the two first larval stages with less exploration and more time resting for these  
263 developmental stages than for the three others. Moreover, stage 2 received less antennal contact and  
264 ovipositor insertion, and stage 1 individuals present a lower suitability for *T. insidiosus* than the  
265 other stages. Stages 1 and 2 larvae also represent only 20 % of the total number of mummies  
266 produced in this experiment (10% each). In general, a lower parasitism rate of young stages is  
267 associated with a higher mortality of the larvae that are more susceptible to the injuries caused at  
268 oviposition (sting and/or venom) (Colinet et al., 2005). In addition, the mortality rate for young  
269 stages could also be higher because they have to go through at least three stages and thus they have  
270 more chance of dying between moults. On the contrary, *T. insidiosus* seems more motivated to find  
271 hosts in presence of psyllid stages 3, 4 and 5 as its time in movement is higher and its time in  
272 resting lower for these stages than for the two first ones. The clues left by the psyllids (honeydew,  
273 exuviae, volatiles...) could stimulate its locomotor behaviour and therefore increase the probability  
274 of the parasitoid to find hosts. This behaviour has already been observed in the parasitoid  
275 *Psyllaephagus pistaciae* whose searching time, locomotor behaviour, antennal drumming and  
276 ovipositor probing was increased by the presence of the pistachio psylla honeydew (Mehrnejad and  
277 Copland, 2006). The antochorid predator, *Orius sauteri*, forage more and lay more eggs in the  
278 presence of the pear psylla (*Cacopsylla chinensis*) honeydew (Ge et al., 2019). In our case, the fact  
279 that only the stages 3, 4 and 5 have this impact on the behaviour of *T. insidiosus* seem to indicate  
280 that the amount and/or the quality of the clues present in the environment are important to trigger  
281 this stimulation. Determining what are the clues influencing the exploratory behaviour of *T.*  
282 *insidiosus* could be an interesting next step of this study. Moreover, our results clearly showed a  
283 lower attraction to the fifth stage as few antennal contacts and ovipositors insertion were made and  
284 no mummy was obtained, with this stage which is probably too big and too advanced in its  
285 development to allow the development of *T. insidiosus*. Indeed, such as aphids facing a parasitoid,  
286 bigger psyllid larval stages are able to run away more easily than younger stages (Villagra et al.,  
287 2002). It has also been shown that the last instar of the aphid *Toxoptera citricida* present a greater  
288 immune response to parasitism (Walker and Hoy, 2003). The absence of mummy in the stage 5

289 could be then explain by a combination between behavioural and immune response of the psyllid to  
290 the parasitoid attack (Colinet et al., 2005). This makes this larval stage to avoid absolutely for the  
291 breeding of the parasitoid, and for releasing periods.

292 From *T. insidiosus* point of view, stages 3 and 4 seem to represent the ideal host for laying  
293 eggs as 80 % of the mummies obtained in this experiment came from these two stages. Although  
294 they are larger and therefore more difficult to manipulate than stage 1 and 2, they seem to be the  
295 best candidates for the female parasitoid concerning the trade-off between the amount of food and  
296 the defense system. By parasitizing the stage 4 of *C. pyri*, *T. insidiosus* attack the psyllid population  
297 at the end of its developmental cycle. Such a characteristic confers a particularly important  
298 efficiency on the population dynamics of its host, and have an immediate repercussion on the  
299 resulting imaginal population and therefore on the next psyllid generation.

300 Concerning the fitness of the parasitoids obtained in our experiments; early stages seem to be  
301 chosen to allocate males as a balanced sex ratio has been observed for the three first host stages,  
302 while the stage 4 was chosen to lay a majority of females. Indeed, it has already been proven that  
303 the host size/stage can influence the sex ratio of the offspring as female are generally laid in large  
304 hosts (Bernal et al., 1997; Jervis and Kidd, 1986; Van Den Assem et al., 1982). This strategy  
305 corresponds to the host size distribution model, which assume that the amount of resources  
306 available for the parasitoid development determines its fitness (Charnov, 1976; Charnov and  
307 Skinner, 1985). It is therefore more interesting for a female parasitoid to lay female eggs in big  
308 hosts that provide more resources (Jervis and Kidd, 1986) so that they have a high amount or  
309 reserve for egg load/production. Our experiments have been done with single females, it would be  
310 then interesting to test if this species in competition condition will produce more male, even in big  
311 hosts, as predicted by the local mate competition theory (Hamilton, 1967).

312 Stages 3 and 4 produced larger individuals than stage 2, probably because those stages have more  
313 abundant reserves that allow the parasitoid to grow further. More surprisingly, females that have  
314 been laid in a stage 1 host appeared to be as large as those, which developed in stage 3 and 4 host.  
315 One of the hypothetical mechanisms would be that when an egg is laid in a stage 1 larvae, the egg  
316 starts to develop only in specific conditions when the psyllid larvae has reached a specific level of  
317 development (Colinet et al., 2005). This hypothesis is supported by the fact that individuals coming  
318 from a stage 1 host take more time to develop than individuals from the other stages. It is also  
319 possible that the larvae of the parasitoid grow less rapidly in order to keep their host alive longer  
320 and thus allow a longer, but complete, development of the adult parasitoid. These hypotheses could  
321 be confirmed by the dissection of stage 2, 3 and 4 larvae that has been parasitized at stage 1 and the  
322 identification of the level of development of the parasitoid.

323 We observed a quite low egg load in *T. insidiosus* female whatever the host stage they developed in,  
324 suggesting that this species is synovogenic and will produce eggs all along its life (around 20 days  
325 fed in lab conditions). Moreover, it is generally observed in parasitoids that the larger the female,  
326 the greater the egg load. In our study, this link is observed only for individuals issued from stage 4,  
327 confirming that this larval stage is the most suitable to lay female eggs. A question arises, anyway:  
328 Why do some large females have no or few mature eggs? The females just had honey and water  
329 before dissection and never met any psyllids. A stimulus such as mating, host feeding (Aung et al.,  
330 2012) or simply the presence of psyllids, is perhaps not necessary but would influence the  
331 production of eggs.

332 Finally, although the host-feeding and the grooming have not been impacted by the host  
333 stage they seem to play a great role in the ecology of *T. insidiosus*. Host-feeding is the consumption  
334 of host fluids exuding from oviposition wounds by the adult female parasitoid (Heimpel and  
335 Collier, 1996). This behaviour has already been described in other encyrtidae species (Aung et al.,  
336 2012) but never in *T. insidiosus*. The number of host-feeding events we observed in our  
337 experiments was very low, probably because the female we used were fed, hydrated and full of eggs  
338 therefore their only concern under these conditions was probably to lay a maximum of eggs. Host-  
339 feeding exist in *T. insidiosus* but to understand under which conditions this behaviour is expressed,  
340 a protocol should probably involve fertilized females but mostly hungry and/or with a low egg load.  
341 They would then have to make a choice between feeding to refill their reserve or their egg load or to  
342 lay eggs. It is also possible that *T. insidiosus* is able to discriminate between a parasitized and a non-  
343 parasitized larva. Therefore, a female arriving in a patch already visited by a conspecific would feed  
344 more easily on a host parasitized by a competitor and thus decrease the competition for his own  
345 descendants, but this hypothesis remains to be tested.

346 Grooming represents almost the half of *T. insidiosus* activity. Psyllids and especially the larvae,  
347 produce a lot of honeydew (Civolani, 2012), which is highly concentrated in sugar (Le Goff et al.,  
348 2019). Therefore, when this substance is on the parasitoid after an ovipositor insertion, it can be the  
349 site of a bacterial and/or fungal infection. This situation probably led to the selection of  
350 individuals that spent a lot of time cleaning themselves (legs, ovipositor antennae...). This  
351 behaviour probably helps individuals to live longer but it also contributes to maintain their  
352 locomotor activity and their ability to detect hosts. From the psyllid point of view this high  
353 honeydew production could also be a protection against parasitoids. Indeed, it has been observed  
354 that the honeydew of the pear psylla *Cacopsylla chinensis* limit the foraging behaviour of its  
355 predators and might form a defense for the psyllid (Ge et al., 2019). Moreover, such as aphid  
356 parasitoids that lost time manipulating and inserting its ovipositor in aphids exuviae, (Muratori et

357 al., 2008), *T. insidiosus* has been observed trying to oviposit in drop of honeydew letting the time to  
358 psyllid larvae to run away. Finally, the time *T. insidiosus* spend grooming is a time that it does not  
359 spent looking for a host. An experiment analyzing the behaviour of the parasitoid with exuviae of  
360 the different stages and/or honeydew could be conducted to clarify the role that the psyllid wastes  
361 could play in its defense against parasitoids.

362 The purpose of this paper was to determine some of the biological characteristics of the pear psyllid  
363 parasitoid, *Trechmites insidiosus*, and to identify the most interesting stages for the development of  
364 this parasitoid. We showed for the first time that stage 3 and 4 larvae are the most interesting in  
365 order to produce individuals in quantity and quality. This provides a basis for further studies and  
366 fulfill the lack of data concerning this insect in the literature, particularly with regard to its biology,  
367 its behaviour and its use in biological management.

368

### 369 **Conflict of interest statement**

370 The authors of this article do not present any conflict of interest

371

### 372 **Author contribution**

373 GJLG, JB, TH designed the study, GJLG and JB, analyzed the data. BD, OL, GJLG caught the  
374 insect to start the rearing, maintained the rearing and the plant cultures. GJLG and TH wrote the  
375 manuscript. All authors contributed to manuscript improvement and gave their final approval for  
376 publication.

377

### 378 **Data availability statement**

379 The datasets analysed during the current study are available from the corresponding author on  
380 reasonable request.

381

### **References**

382

383 Armand E, Lyoussouf A, Rieux R, 1991. Evolution du complexe parasitaire des psylles du poirier  
384 *Psylla pyri* et *Psylla pyrisuga* (Homoptera : Psyllidae). *Entomophaga* 36, 287–294.

385 Armand E, Lyoussoufi A, d’Arcier FF, Rieux R, 1990. Inter-relations entre les populations du  
386 psylle du poirier *Psylla pyri* (L.) (Hom., Psyllidae) et le complexe de ses parasitoïdes dans un  
387 verger traité du sud-est de la France. *J. Appl. Entomol.* 110, 242–252.

- 388 Aung KSD, Takasu K, Ueno T, Takagi M, 2012. Effect of Host-feeding on Reproduction in  
389 *Ooencyrtus nezarae* (Ishii) (Hymenoptera: Encyrtidae), an Egg Parasitoid of the Bean Bug  
390 *Riptortus clavatus*. J. Fac. Agric. Kyushu Univ. 57, 115–120.
- 391 Bernal JS, Waggoner M, Gonzalez D, 1997. Reproduction of *Aphelinus albidopus* (Hymenoptera:  
392 Aphelinidae) on russian wheat aphid (Homoptera: Aphididae) hosts. Eur. J. Entomol. CN -  
393 a10197 94, 83–96.
- 394 Booth SR, 1992. The potential of endemic natural enemies to suppress pear psylla, *Cacopsylla*  
395 *pyricola* Förster, in the Hood River Valley, Oregon. Oregon State University.
- 396 Buès R, Boudinhon L, Toubon J-F, 2003. Resistance of pear psylla (*Cacopsylla pyri* L.; Hom.,  
397 Psyllidae) to deltamethrin and synergism with piperonyl butoxide. J. Appl. Entomol. 127, 305–  
398 312.
- 399 Bufaur M, Harizanova V, Stoeva A, 2010. Parasitoids of the pear sucker *Cacopsylla pyri* L.  
400 (Psyllidae) in Bulgaria - Morphology and biology, in: Jubilee Scientific Conference with  
401 International Participation Traditions and Challenges of Agricultural Education, Science and  
402 Business.
- 403 Burts EC, 1983. Effectiveness of a Soft-Pesticide Program on Pear Pests. J. Econ. Entomol. 76,  
404 936–941.
- 405 Chang J, 1977. Studies on the susceptibility of pear trees to pear psylla, *Psylla pyricola* Foerster  
406 (Homoptera: psyllidae). University of Ottawa, Ottawa, Canada.
- 407 Charnov EL, 1976. Optimal foraging, the marginal value theorem. Theor. Popul. Biol. 9, 129–136.
- 408 Charnov EL, Skinner SW, 1985. Complementary Approaches to the Understanding of Parasitoid  
409 Oviposition Decisions. Environ. Entomol. 14, 383–391.
- 410 Civolani S, 2012. The Past and Present of Pear Protection Against the Pear Psylla, *Cacopsylla pyri*  
411 L., in: Perveen, F. (Ed.), Insecticides - Pest Engineering. InTech, 385–408.
- 412 Civolani S, Peretto R, Caroli L, Pasqualini E, Chicca M, Leis M, 2007. Preliminary Resistance  
413 Screening on Abamectin in Pear Psylla (Homoptera: Psyllidae) in Northern Italy. J. Econ.  
414 Entomol. 100, 1637–1641.
- 415 Colinet H, Salin C, Boivin G, Hance T, 2005. Host age and fitness-related traits in a koinobiont  
416 aphid parasitoid. Ecol. Entomol. 30, 473–479.
- 417 DuPont ST, John Strohm C, 2020. Integrated pest management programmes increase natural  
418 enemies of pear psylla in Central Washington pear orchards. J. Appl. Entomol. 144, 109–122.
- 419 Emami MS, Shishehbor P, Karimzadeh J, 2014. The influences of plant resistance on predation rate  
420 of *Anthocoris nemoralis* (Fabricius) on *Cacopsylla pyricola* (Förster). Arch. Phytopathol. Plant  
421 Prot. 47, 2043–2050.
- 422 Erler F, 2004. Natural enemies of the pear psylla *Cacopsylla pyri* in treated vs untreated pear  
423 orchards in Antalya, Turkey. Phytoparasitica 32, 295–304.
- 424 FAOSTAT, 2020. <http://www.fao.org/faostat/en/#data/QC>

- 425 Ge Y, Liu P, Zhang L, Snyder WE, Smith OM, Shi W, 2020. A sticky situation: honeydew of the  
426 pear psylla disrupts feeding by its predator *Orius sauteri*. *Pest Manag. Sci.* 76, 75–84.
- 427 Guerrieri E, Noyes JS, 2009. A review of the European species of the genus *Trechnites* Thomson  
428 (Hymenoptera: Chalcidoidea: Encyrtidae), parasitoids of plant lice (Hemiptera: Psylloidea)  
429 with description of a new species. *Syst. Entomol.* 34, 252–259.
- 430 Hamilton WD, 1967. Extraordinary sex ratios. A sex-ratio theory for sex linkage and inbreeding has  
431 new implications in cytogenetics and entomology. *Science* 156, 477–488.
- 432 Heimpel GE, Collier TR, 1996. The evolution of host-feeding behaviour in insect parasitoids. *Biol.*  
433 *Rev. CN* - e16136 71, 373–400.
- 434 Herard F, 1985. Analysis of parasite and predator populations observed in pear orchards infested by  
435 *Psylla pyri* (L.) (Hom. : Psyllidae) in France. *Agronomie* 5, 773–778.
- 436 Jaworska K, Olszak RW, Zajac RZ, 1996. Parasitization rate on the larvae of pear (*Cacopsylla pyri*)  
437 in orchards with differing intensity of chemical control. *Acta Hort.* 422, 334–335.
- 438 Jerinic-Prodanovic D, Protic L, Mihajlovic L, 2010. Predators and parasitoids of *Cacopsylla pyri*  
439 (L.) (Hemiptera: Psyllidae) in Serbia. *Pestic. i fitomedicina* 25, 29–42.
- 440 Jervis MA, Kidd NAC, 1986. Host-feeding strategies in Hymenopteran parasitoids. *Biol. Rev. CN* -  
441 f17091 61, 395–434.
- 442 Lacey L, Arthurs S, Horton D, Miliczky G, 2005. Spinosad and granulovirus effects on codling  
443 moth. USDA-ARS, Yakima Agricultural Research Laboratory, Wapato, WA, Wapato.
- 444 Le Goff GJ, Lebbe O, Lohaus G, Richels A, Jacquet N, Byttebier V, Hance T, 2019. What are the  
445 nutritional needs of the pear psylla *Cacopsylla pyri*? *Arthropod. Plant. Interact.* 13, 431–439.
- 446 McMullen RD, 1966. New Records of Chalcidoid Parasites and Hyperparasites of *Psylla pyricola*  
447 Förster in British Columbia. *Can. Entomol.* 98, 236–239.
- 448 Mehrnejad MR, Copland MJW, 2006. Behavioral responses of the parasitoid *Psyllaephagus*  
449 *pistaciae* (Hymenoptera: Encyrtidae) to host plant volatiles and honeydew. *Entomol. Sci.* 9,  
450 31–37.
- 451 Muratori FB, Damians D, Hance T, Boivin G, 2008. Bad housekeeping: why do aphids leave their  
452 exuviae inside the colony? *BMC Evol. Biol.* 8.
- 453 Oudeh B, Kassis W, Abu-Tara R, 2013. Seasonal Activity of the Predator, *Anthocoris nemoralis*  
454 (F.) and the Parasitoid, *Trechnites psyllae* (R.) against the Pear Psylla *Cacopsylla pyricola* (F.)  
455 (Hemiptera: Psyllidae). *Egypt. J. Biol. Control* 23, 17–23.
- 456 Sanchez JA, Ortin-Angulo MC, 2012. Abundance and population dynamics of *Cacopsylla pyri*  
457 (Hemiptera: Psyllidae) and its potential natural enemies in pear orchards in southern Spain.  
458 *Crop Prot.* 32, 24–29.
- 459 Seemüller E, Schneider B, 2004. ‘Candidatus *Phytoplasma mali*’, ‘Candidatus *Phytoplasma pyri*’  
460 and ‘Candidatus *Phytoplasma prunorum*’, the causal agents of apple proliferation, pear decline  
461 and European stone fruit yellows, respectively. *Int. J. Syst. Evol. Microbiol.* 54, 1217–1226.

- 462 Unruh TR, Westigard PH, Hagen KS, 1994. Pear Psylla, in: Biological Control in the Western  
 463 United State. DANR Publications, 95–100.
- 464 Van Den Assem J, Gijswijt MJ, Nübel BK, 1982. Characteristics of courtship and mating behaviour  
 465 used as classificatory criteria in Eulophidae-Tetrastichinae (Hymenoptera), with special  
 466 reference to the genus Tetrastichus. Tijdschrift voor Entomol. CN - f17056 125, 205–219.
- 467 Villagra CA, Ramirez CC, Niemeyer HM, 2002. Antipredator responses of aphids to parasitoids  
 468 change as a function of aphid physiological state. Anim. Behav. CN - a10564 64, 677–683.
- 469 Walker AM, Hoy MA, 2003. Responses of Lipolexis oregmae (Hymenoptera: Aphidiidae) to  
 470 Different Instars of Toxoptera citricida (Homoptera: Aphididae). J. Econ. Entomol. 96, 1685–  
 471 1692.

472

**Table 1: Mean total number and mean total duration ± standard deviation of the different observed behaviours. Different letters indicate significant differences (n=10)**

|                                        | Stage 1              | Stage 2            | Stage 3            | Stage 4             | Stage 5             |
|----------------------------------------|----------------------|--------------------|--------------------|---------------------|---------------------|
| <b>Number of antennal contacts</b>     | 17,50 ±<br>21,06 ab  | 9,60 ±<br>13,66 a  | 32,10 ±<br>30,19 b | 31,70 ±<br>16,26 b  | 16,00 ±<br>10,19 ab |
| <b>Number of ovipositor insertions</b> | 10,00 ±<br>13,33 abc | 4,70 ± 7,90<br>ac  | 14,80 ±<br>11,72 b | 17,80 ±<br>11,31 bc | 4,00 ± 3,62<br>ac   |
| <b>Number of host feeding</b>          | 0,00 ± 0,00<br>a     | 0,10 ± 0,32<br>a   | 0,10 ± 0,32<br>a   | 0,10 ± 0,32<br>a    | 0,00 ± 0,00<br>a    |
| <b>Host feeding duration (%)</b>       | 0,00 ± 0,00<br>a     | 0,20 ± 0,62<br>a   | 0,01 ± 0,04<br>a   | 0,22 ± 0,70<br>a    | 0,00 ± 0,00<br>a    |
| <b>Time walking (%)</b>                | 28,27 ±<br>21,72 a   | 18,49 ±<br>16,34 b | 36,06 ±<br>18,77 c | 33,32 ±<br>6,91 c   | 42,26 ±<br>10,73 c  |
| <b>Time resting (%)</b>                | 16,73 ±<br>25,22 a   | 32,14 ±<br>31,67 a | 3,76 ± 6,14<br>b   | 0,86 ± 1,53<br>b    | 0,71 ± 1,84<br>b    |
| <b>Grooming duration (%)</b>           | 36,16 ±<br>19,97 a   | 40,19 ±<br>16,67 a | 40,15 ±<br>21,65 a | 41,81 ±<br>11,04 a  | 49,74 ±<br>11,01 a  |

**Table 2: Mean ± standard deviation of the different measured parameters of emerging parasitoids quality, and number of replicates for each psyllid larval host stage**

|                                             | <b>Stage 1</b>         | <b>Stage 2</b>         | <b>Stage 3</b>          | <b>Stage 4</b>          |
|---------------------------------------------|------------------------|------------------------|-------------------------|-------------------------|
| <b>Sex ratio</b>                            | 0.33                   | 0.30                   | 0.49                    | 0.21                    |
| <b>Female tibia size (mm)</b>               | 0.36 ± 0.02 a<br>(n=9) | 0.33 ± 0.03 b<br>(n=9) | 0.36 ± 0.02<br>b (n=35) | 0.36 ± 0.02 b<br>(n=46) |
| <b>Male tibia size (mm)</b>                 | 0.33 ± 0.02<br>(n=3)   | 0.32 ± 0.02<br>(n=4)   | 0.33 ± 0.03<br>b (n=36) | 0.34 ± 0.02 b<br>(n=12) |
| <b>Egg load</b>                             | 19.77 ± 10.50<br>(n=9) | 8.48 ± 6.75<br>(n=9)   | 11.44 ± 7.45<br>(n=35)  | 11.30 ± 10.70<br>(n=46) |
| <b>Developmental time of females (days)</b> | 30.33 ± 2.65<br>(n=9)  | 22.33 ± 3.74<br>(n=9)  | 22.66 ± 2.83<br>(n=35)  | 21.89 ± 2.08<br>(n=46)  |
| <b>Developmental time of males (days)</b>   | 31.33 ± 1.53<br>(n=3)  | 26.25 ± 7.23<br>(n=4)  | 22.86 ± 2.83<br>(n=36)  | 20.50 ± 1.93<br>(n=12)  |

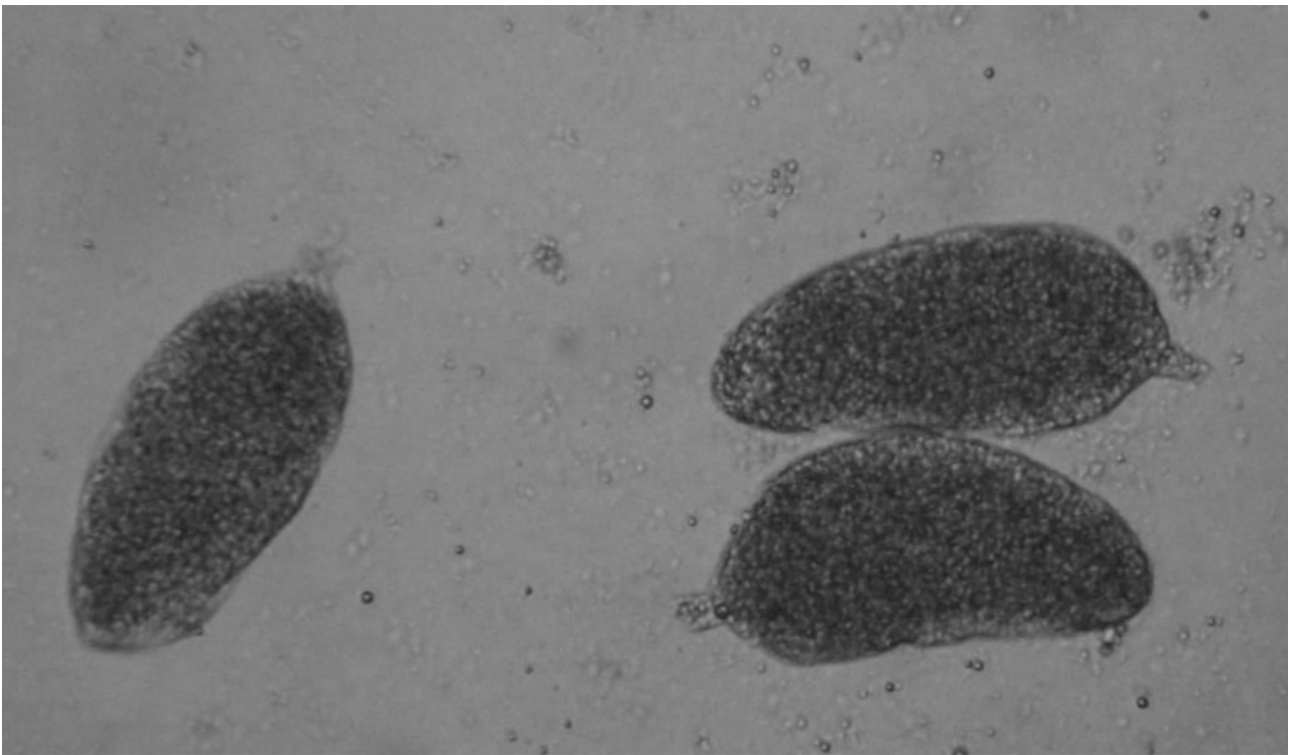

**Figure 1 : mature eggs of *Trechnites insidiosus***



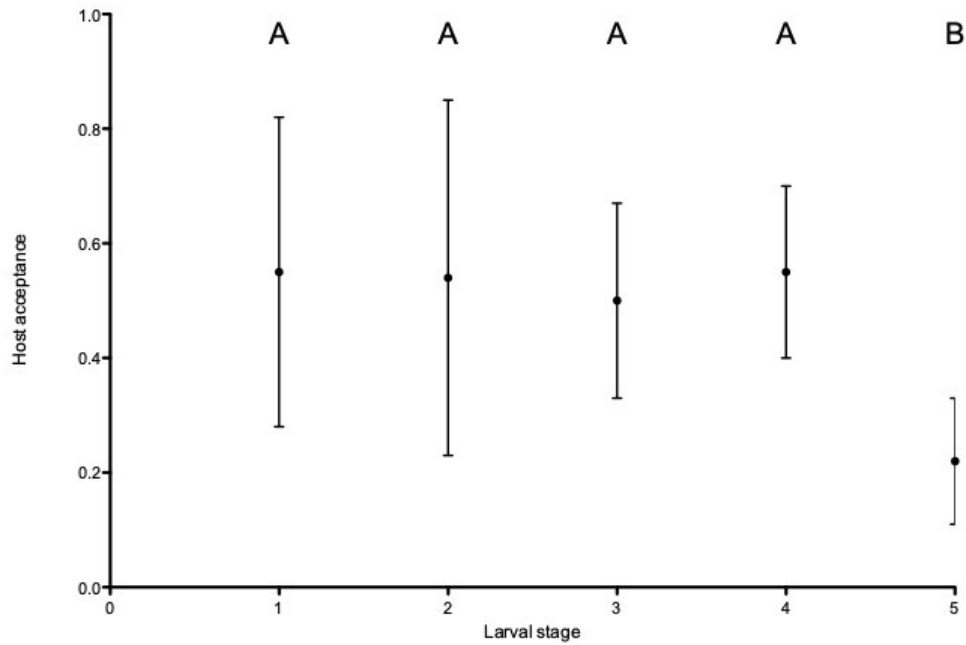

**Figure 2: Mean host acceptance (number of ovipositor insertion/number of antennal contacts) according to the developmental stage of the host  $\pm$  standard deviation. Different letters indicate significant differences (stage 1, n = 6; stage 2, n = 5; stage 3, n = 9; stages 4, n=10; stage 5, n = 10)**

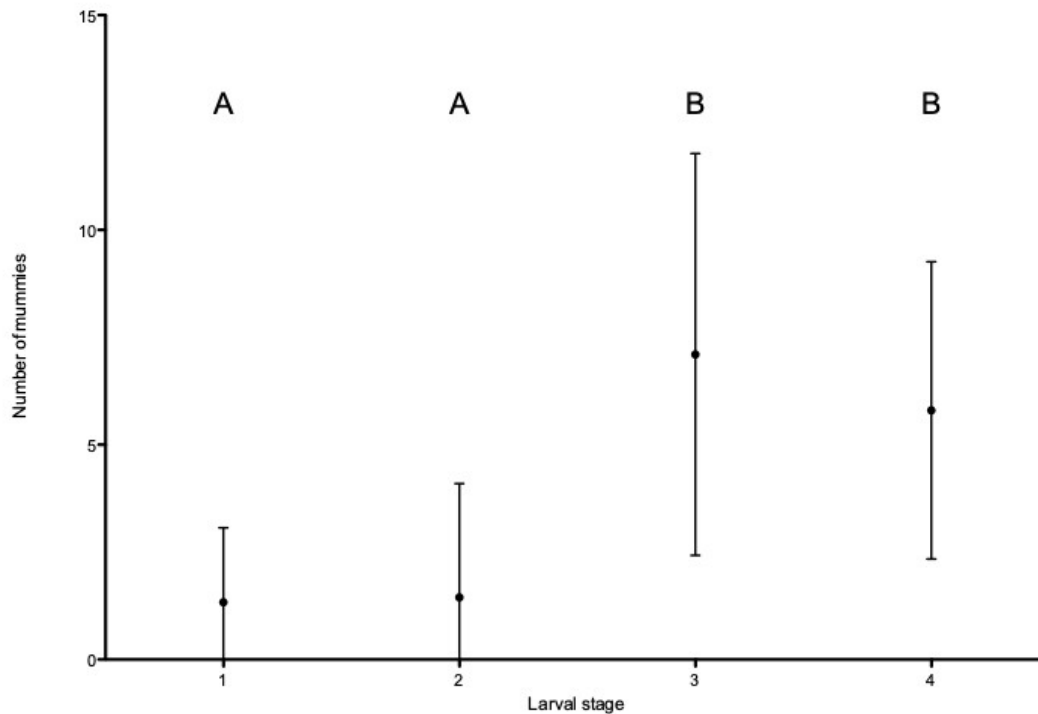

**Figure 3: Mean number of mummies according to the developmental stage of the host  $\pm$  standard deviation. Different letters indicate significant differences (n=10)**

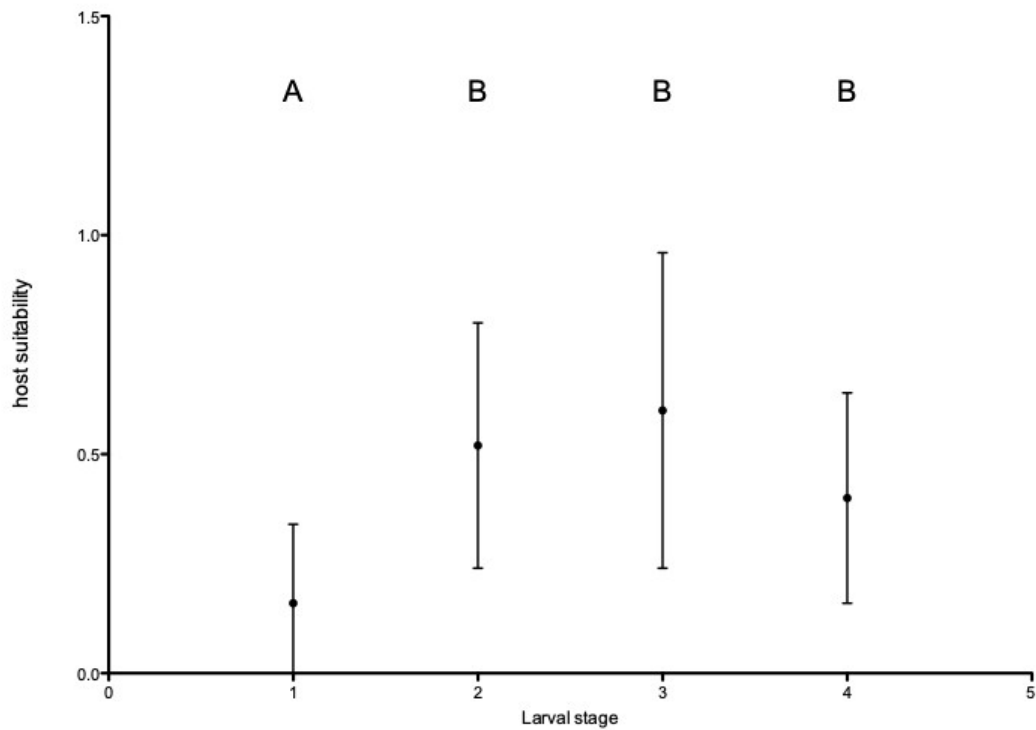

**Figure 4: Mean host suitability (number of mummies/number of ovipositor insertions) according to the developmental stage of the host  $\pm$  standard deviation. Different letters indicate significant differences (stage 1, n = 6; stage 2, n = 5; stage 3, n = 10; stages 4, n=10; stage 5, n = 9)**

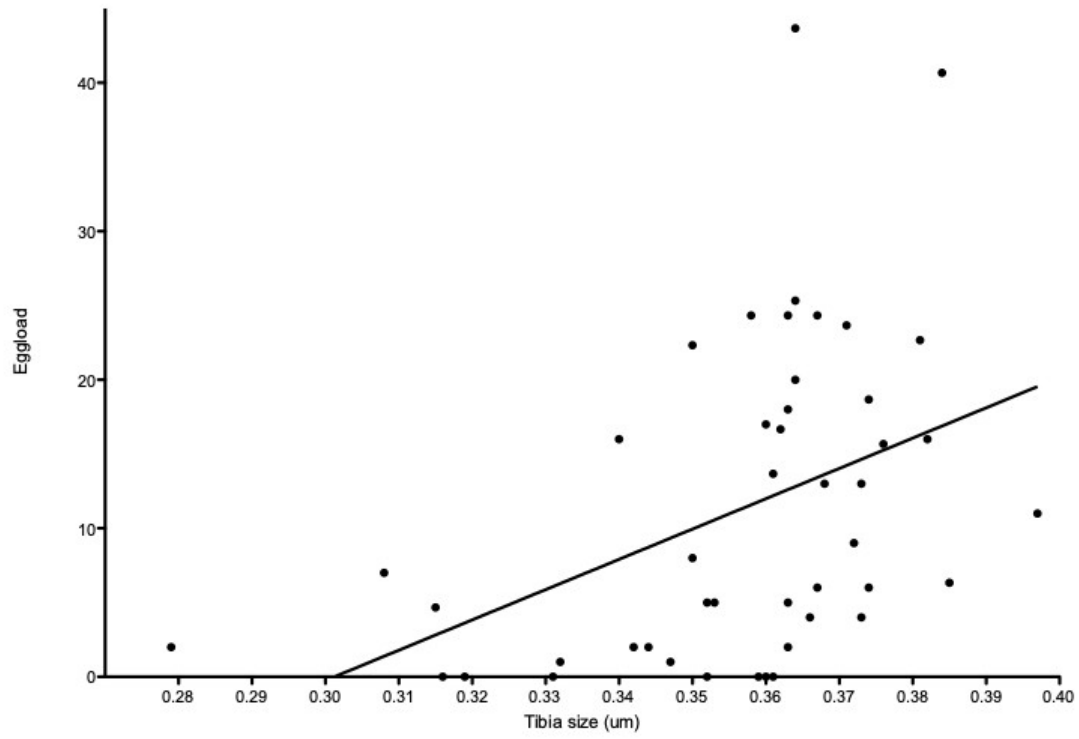

**Figure 5: Correlation of the number of eggs per female from the stage 4 with the tibia size (n=46)**
